# Supplementary material for: Drought Sensitivity of Spring Wheat Cultivars Shapes Rhizosphere Microbial Community Patterns in Response to Drought
Source: MDPI journal article supplement (doi:10.3390/plants12203650), 2023-10-23
Supplement: s1 [file s1]

**Table S1.** Spring wheat variety information

| Variety        | Abbreviation | Approval year                                   | Breeding organization                                                      |
|----------------|--------------|-------------------------------------------------|----------------------------------------------------------------------------|
| Nongmai No. 2  | T.N2         | National authorized wheat Variety 2006030       | Crop Research Institute of Inner Mongolia Academy of Agricultural Sciences |
| Bafeng No. 5   | T.N5         | National authorized wheat Variety 2009028       | Bayannaoer Academy of Agricultural and Animal Husbandry Sciences           |
| Bamai No. 12   | T.N12        | Inner Mongolia authorized wheat variety 2015002 | Bayannaoer Academy of Agricultural and Animal Husbandry Sciences           |
| Longmai No. 33 | T.N33        | National authorized wheat Variety 2010022       | Crop Breeding Institute of Heilongjiang Academy of Agricultural Sciences   |
| Longmai No. 36 | T.N36        | Heilongjiang authorized wheat Variety 2013001   | Crop Breeding Institute of Heilongjiang Academy of Agricultural Sciences   |
| Dingxi No. 40  | T.N40        | National authorized wheat Variety 2009032       | Dingxi Dry Farming Research and Extension Center, Gansu Province           |

**Table S2.** Primer sequence information

| Primer name | Primer sequence (5'- 3')      | Product size (bp) | Annealing temperature (°C) |
|-------------|-------------------------------|-------------------|----------------------------|
| Wdreb2      | F: AGATGTTGCTTCTTCCTTGCC      | 162               | 60                         |
|             | R: GATGTGCTCCTTGAAATGCTTG     |                   |                            |
| BADHb       | F: GTGGACTCTATTTGGGTGCTTTTGG  | 231               | 60                         |
|             | R: GCACCTTCACTTTTAGCATTCGCTAC |                   |                            |
| Actin       | F: CTTGTATGCCAGCGGTCGAACA     | 241               | 60                         |
|             | R: CTCATAATCAAGGGCCACGTA      |                   |                            |

**Table S3.** Compared with the control, the specific data table of bacterial OTUs enrichment and depletion in T.L36 and T.B12 spring wheat varieties under drought treatment.

| Category | Sample comparison    | OTU_number                                   | Taxa                                                                                                 | log2FoldChange | p_value     | Log10 Average Abundance | group | number |
|----------|----------------------|----------------------------------------------|------------------------------------------------------------------------------------------------------|----------------|-------------|-------------------------|-------|--------|
| Bacteria | CK_T.B12-vs-DT_T.B12 | OTU_634                                      | P_Firmicutes; c_Bacilli; o_Bacillales; f_Paenibacillaceae; g_Brevibacillus; s_Brevibacillus_reuszeri | 3              | 0.007762603 | -4.545257621            | Up    |        |
|          |                      | OTU_926                                      | P_Firmicutes; c_Clostridia; o_Clostridiales; f_Lachnospiraceae                                       | 4.502500341    | 0.000856072 | -3.648241782            | Up    | 3      |
|          |                      | OTU_1828                                     | P_Bacteroidetes; c_Bacteroidia; o_Bacteroidales; f_Muribaculaceae                                    | 3.807354922    | 0.001498449 | -4.022378876            | Up    |        |
|          | CK_T.L36-vs-DT_T.L36 | A total of 198 Depicted OTUs were identified |                                                                                                      |                |             |                         |       |        |
|          | CK_T.B12-vs-DT_T.B12 | A total of 118 Depicted OTUs were identified |                                                                                                      |                |             |                         |       |        |

**Table S4.** Compared with the control, the specific data table of fungal OTUs enrichment and depletion in T.L36 and T.B12 spring wheat varieties under drought treatment.

| Category | Sample comparison    | OTU_number                                 | Taxa                                                                                                                                                            | log2FoldChange | p_value     | Log10 Average Abundance | group | number |
|----------|----------------------|--------------------------------------------|-----------------------------------------------------------------------------------------------------------------------------------------------------------------|----------------|-------------|-------------------------|-------|--------|
| Fungi    | CK_T.L36-vs-DT_T.L36 | OTU_31                                     | p__Ascomycota;c__Eurotiomycetes;o__Eurotiales;f__Aspergillaceae;g__Penicillium;s__Penicillium_sp                                                                | 3.48112669     | 0.003276175 | -3.655451578            | Up    | 2      |
|          |                      | OTU_65                                     | p__Ascomycota;c__Sordariomycetes;o__unidentified_Sordariomycetes_sp;f__unidentified_Sordariomycetes_sp;g__unidentified_Sordariomycetes_sp;s__Sordariomycetes_sp | 2.497499659    | 0.007990344 | -3.465695995            | Up    |        |
|          | CK_T.B12-vs-DT_T.B12 | OTU_38                                     | p__Ascomycota;c__Sordariomycetes;o__Sordariales;f__Chaetomiaceae;g__Chaetomium;s__Chaetomium_perlucidum                                                         | -4             | 0.003496578 | -3.987295521            | Down  | 3      |
|          |                      | OTU_116                                    | p__Ascomycota;c__Dothideomycetes;o__Pleosporales;f__Periconiaceae;g__Periconia;s__Periconia_sp                                                                  | -3.736965594   | 0.00159644  | -3.885305983            | Down  |        |
|          |                      | OTU_377                                    | p__Ascomycota;c__Dothideomycetes;o__Pleosporales;f__Leptosphaeriaceae;g__Leptosphaeria;s__Leptosphaeria_sp                                                      | -3.584962501   | 0.009963864 | -4.404831086            | Down  |        |
|          | CK_T.L36-vs-DT_T.L36 | A total of 5 Depicted OTUs were identified |                                                                                                                                                                 |                |             |                         |       |        |
|          | CK_T.B12-vs-DT_T.B12 | A total of 3 Depicted OTUs were identified |                                                                                                                                                                 |                |             |                         |       |        |



**Table S5.** The topological characteristics of the co-occurrence network of rhizosphere microbial communities of different spring wheat varieties under drought stress (Figure 7 and S9).

| category                       | Bacteria |          |          |          | Fungi    |          |          |          |
|--------------------------------|----------|----------|----------|----------|----------|----------|----------|----------|
|                                | CK_T.L36 | DT_T.L36 | CK_T.B12 | DT_T.B12 | CK_T.L36 | DT_T.L36 | CK_T.B12 | DT_T.B12 |
| Sample                         | CK_T.L36 | DT_T.L36 | CK_T.B12 | DT_T.B12 | CK_T.L36 | DT_T.L36 | CK_T.B12 | DT_T.B12 |
| Nodes                          | 99       | 100      | 98       | 98       | 100      | 100      | 100      | 99       |
| Edges                          | 2103     | 1273     | 2600     | 1298     | 1369     | 2400     | 2220     | 1254     |
| Average degree                 | 53.061   | 26.49    | 42.485   | 25.46    | 22.2     | 25.333   | 27.38    | 24       |
| Average weighted degree        | 45.714   | 1.224    | 125.495  | 18.16    | 9.76     | 63.838   | 27.6     | 7.92     |
| Network diameter               | 1        | 1        | 1        | 1        | 1        | 1        | 1        | 1        |
| Graph density                  | 0.547    | 0.273    | 0.434    | 0.257    | 0.224    | 0.259    | 0.277    | 0.242    |
| Modularity                     | 0.046    | 10.567   | 0.218    | 2.085    | 1.544    | 0.621    | 1.377    | 1.764    |
| Average clustering coefficient | 1        | 1        | 1        | 1        | 1        | 1        | 1        | 1        |
| average path length            | 1        | 1        | 1        | 1        | 1        | 1        | 1        | 1        |

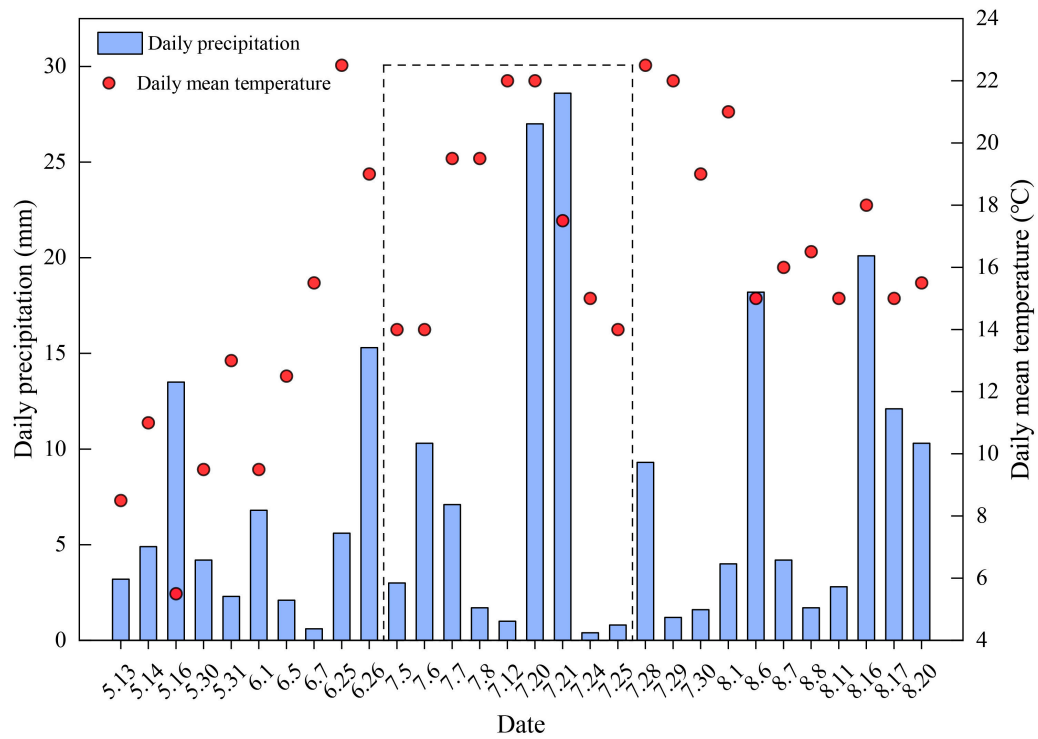

**Figure S1.** The distribution map of daily precipitation and daily average temperature during the whole growth period of spring wheat in 2019

Note: The dotted line frame in the picture is that the water control treatment time for the dry shed rain control - regulate water replenishment is from July 5 to July 25.

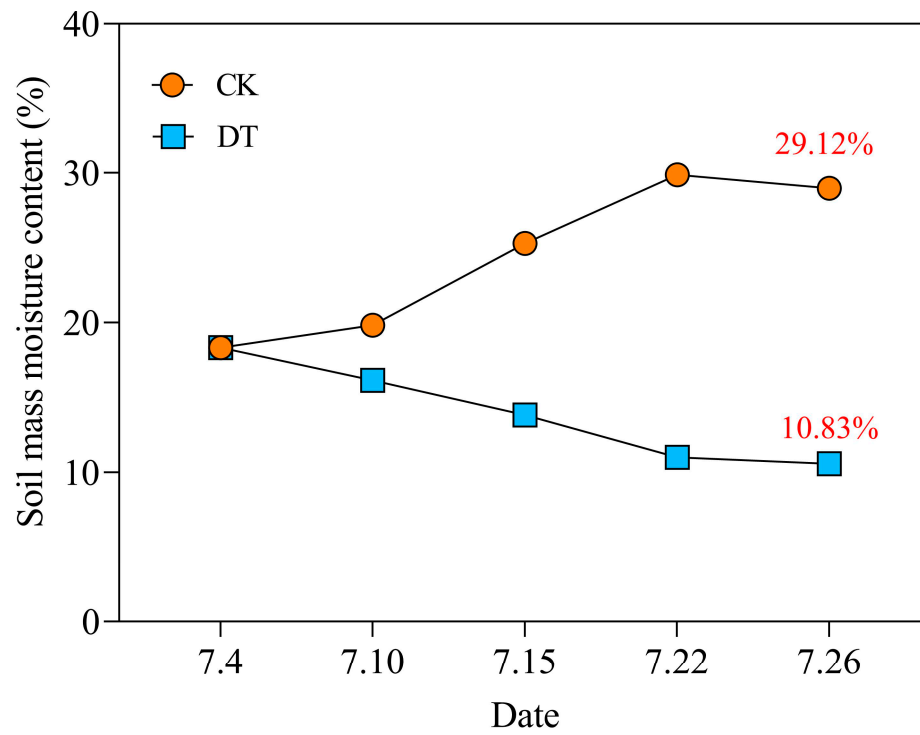

**Figure S2.** Monitoring of soil mass water content under drought treatment

Note: The control treatment (CK) was water replenishing twice (July 11, and July 16), supplementary water amount: each treatment was repeated 3 times, totaling 2 m<sup>3</sup>.

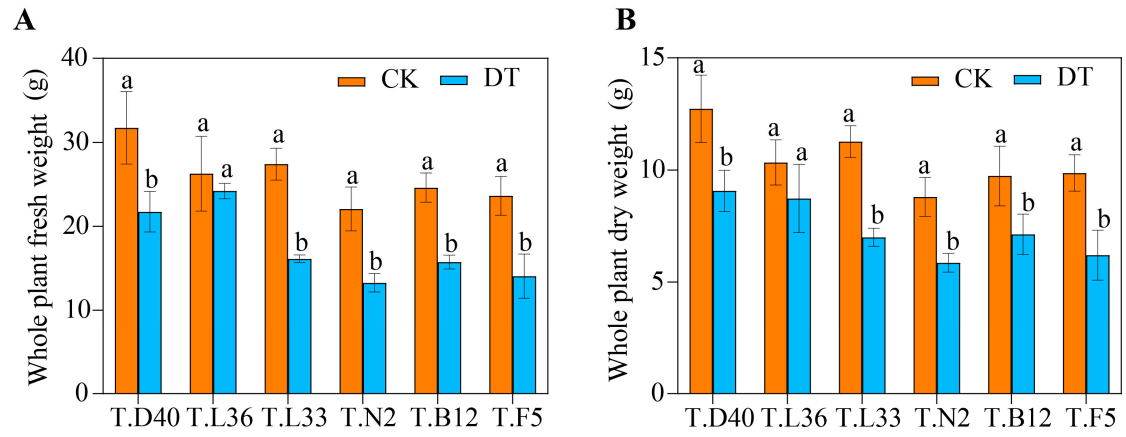

**Figure S3.** Effects of drought stress on fresh weight, and dry weight of spring wheat

Note: (A) Whole plant fresh weight (FW). (B) Whole plant dry weight (DW). Different letters indicate significant differences at the 0.05 level.

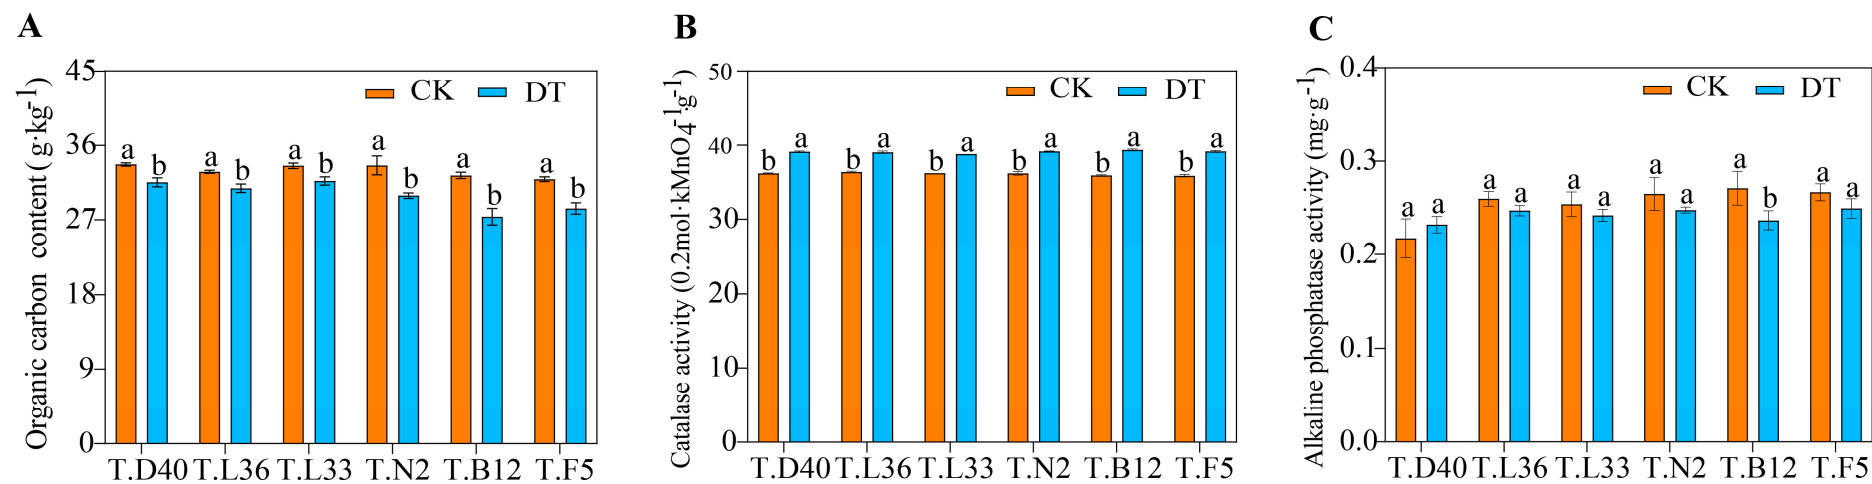

**Figure S4.** Effects of drought stress on soil organic carbon and enzyme activity of spring wheat

Note: (A) Organic carbon content (SOC). (B) Catalase activity (S-CAT). (C) Alkaline phosphatase activity (S-ALP). Different letters indicate significant differences at the 0.05 level.

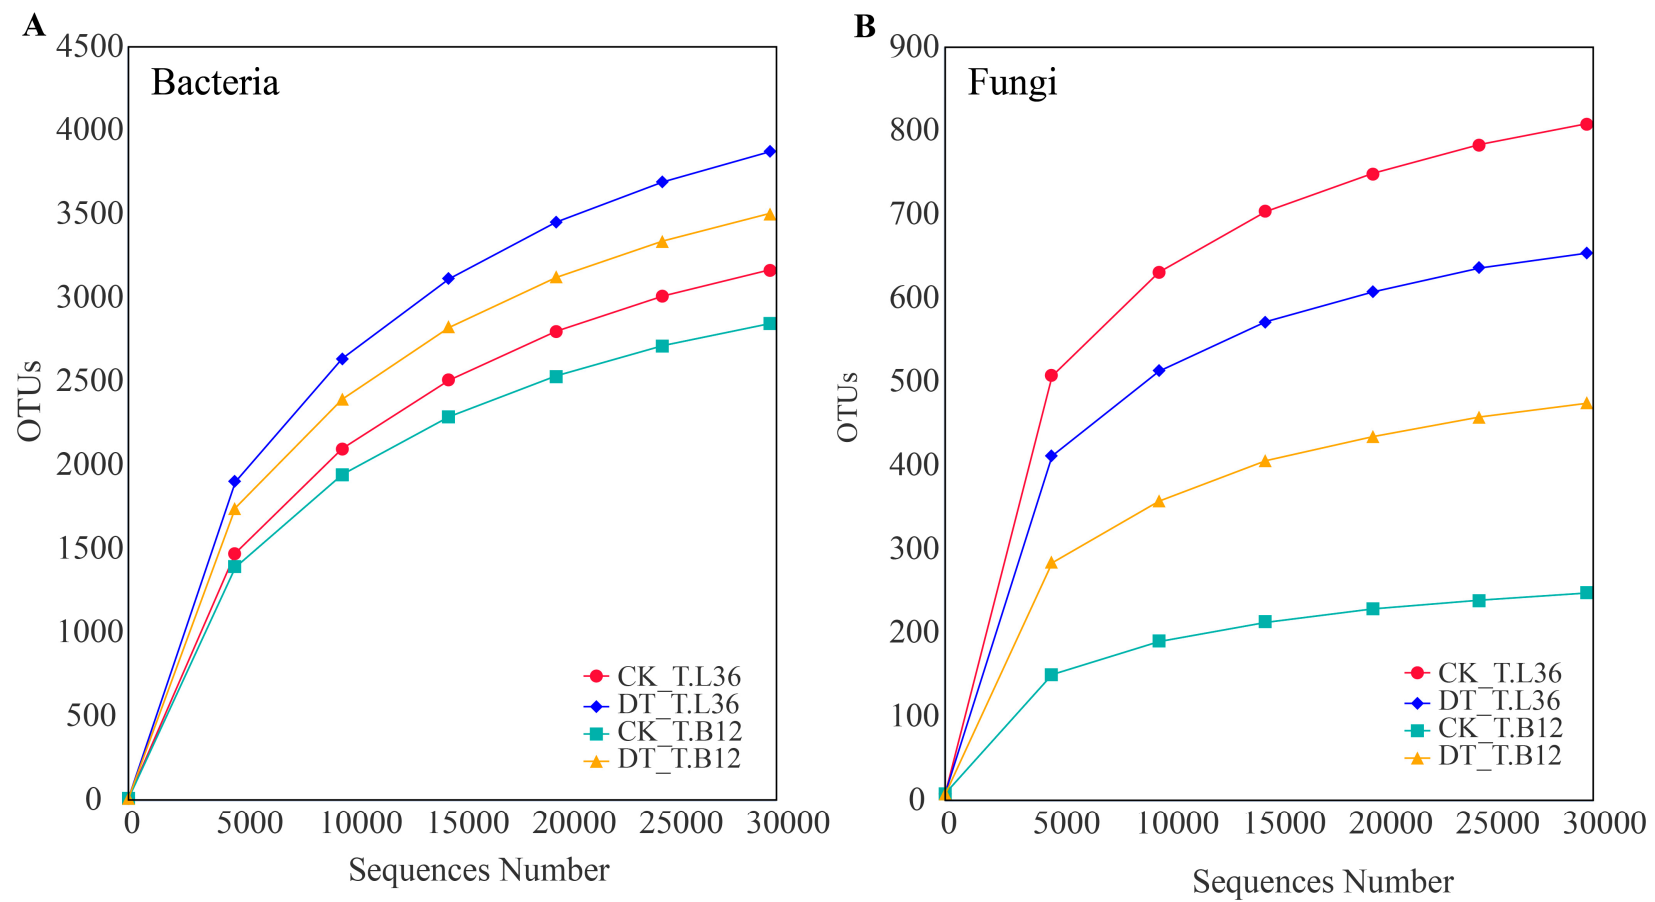

**Figure S5.** Effects of drought stress on rhizosphere microbial rarefaction curves of T.L36 and T.B12

Note: (A) Rhizosphere bacterial rarefaction curve. (B) Rhizosphere fungi rarefaction curve.

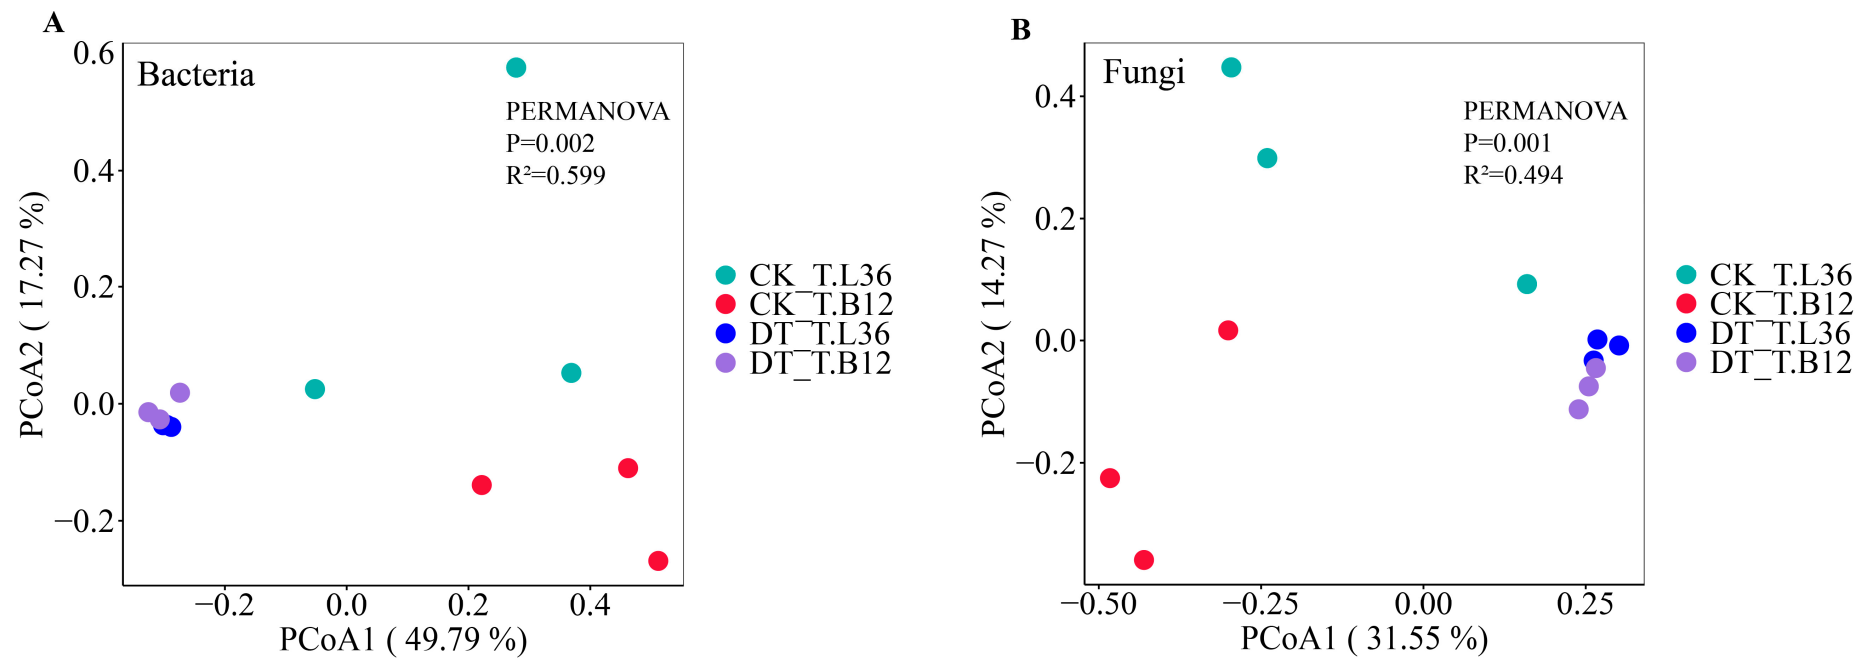

**Figure S6.** PCOA analysis of T.L36 and T.B12 rhizosphere microbial community composition under drought stress

Note: (A) Rhizosphere bacterial PCOA analysis. (B) Rhizosphere fungi PCOA analysis.

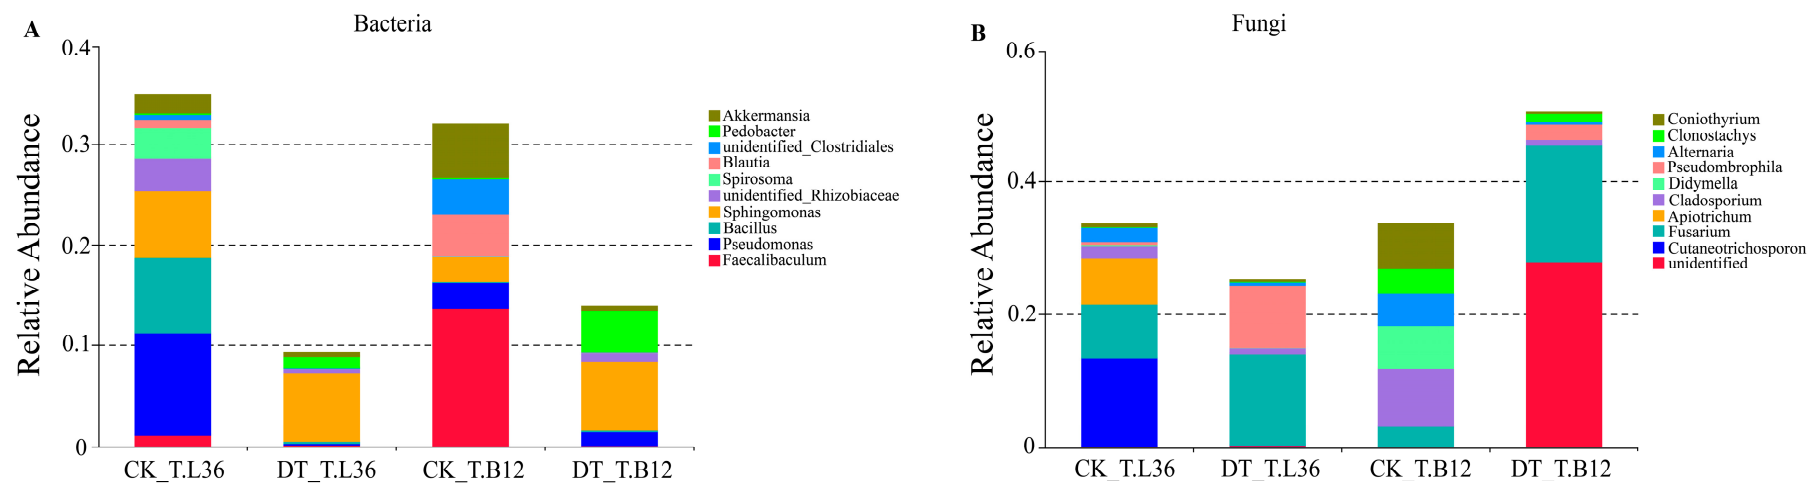

**Figure S7.** T. L36 and T. B12 under drought stress Species composition at the genus level

Note: (A) Species composition of rhizosphere bacteria at the genus level. (B) Species composition rhizosphere fungi at the genus level.



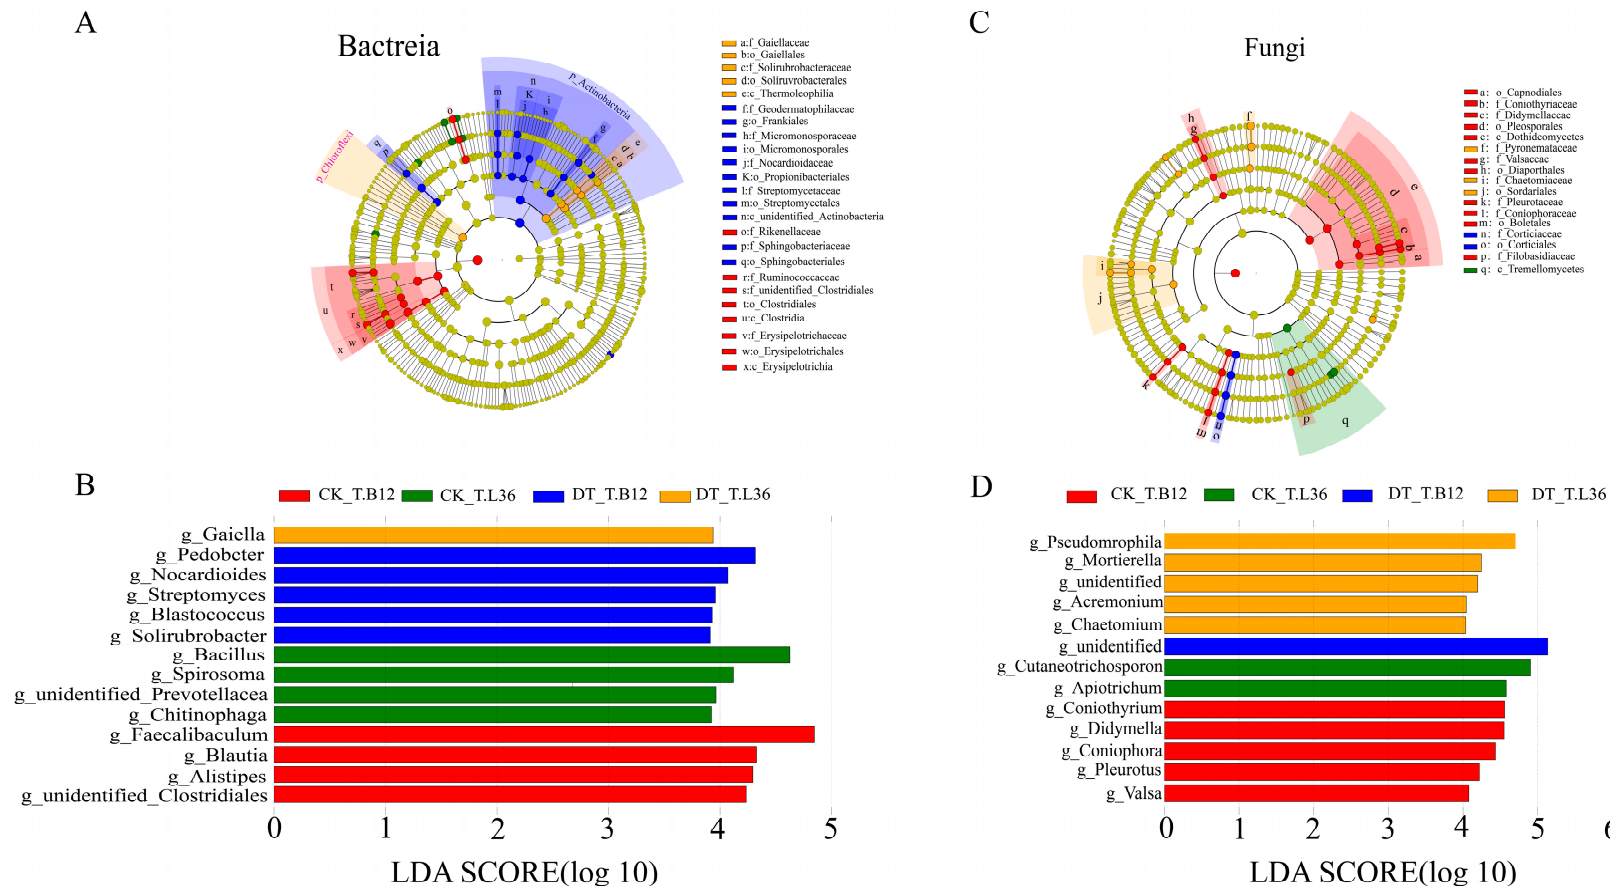

**Figure S8.** Lefse analysis of species with significant differences between T.L36 and T.B12 rhizosphere microbial groups under drought stress

Note: (A) Bacterial Lefse analysis evolutionary branch diagram. (B) Columnar diagram of LDA analysis of bacteria, LDA score of 3.9,  $P < 0.05$ . (C) Fungal Lefse analysis evolutionary branch diagram. (D) Columnar diagram of LDA analysis of fungi, LDA score of 3.9,  $P < 0.05$ .

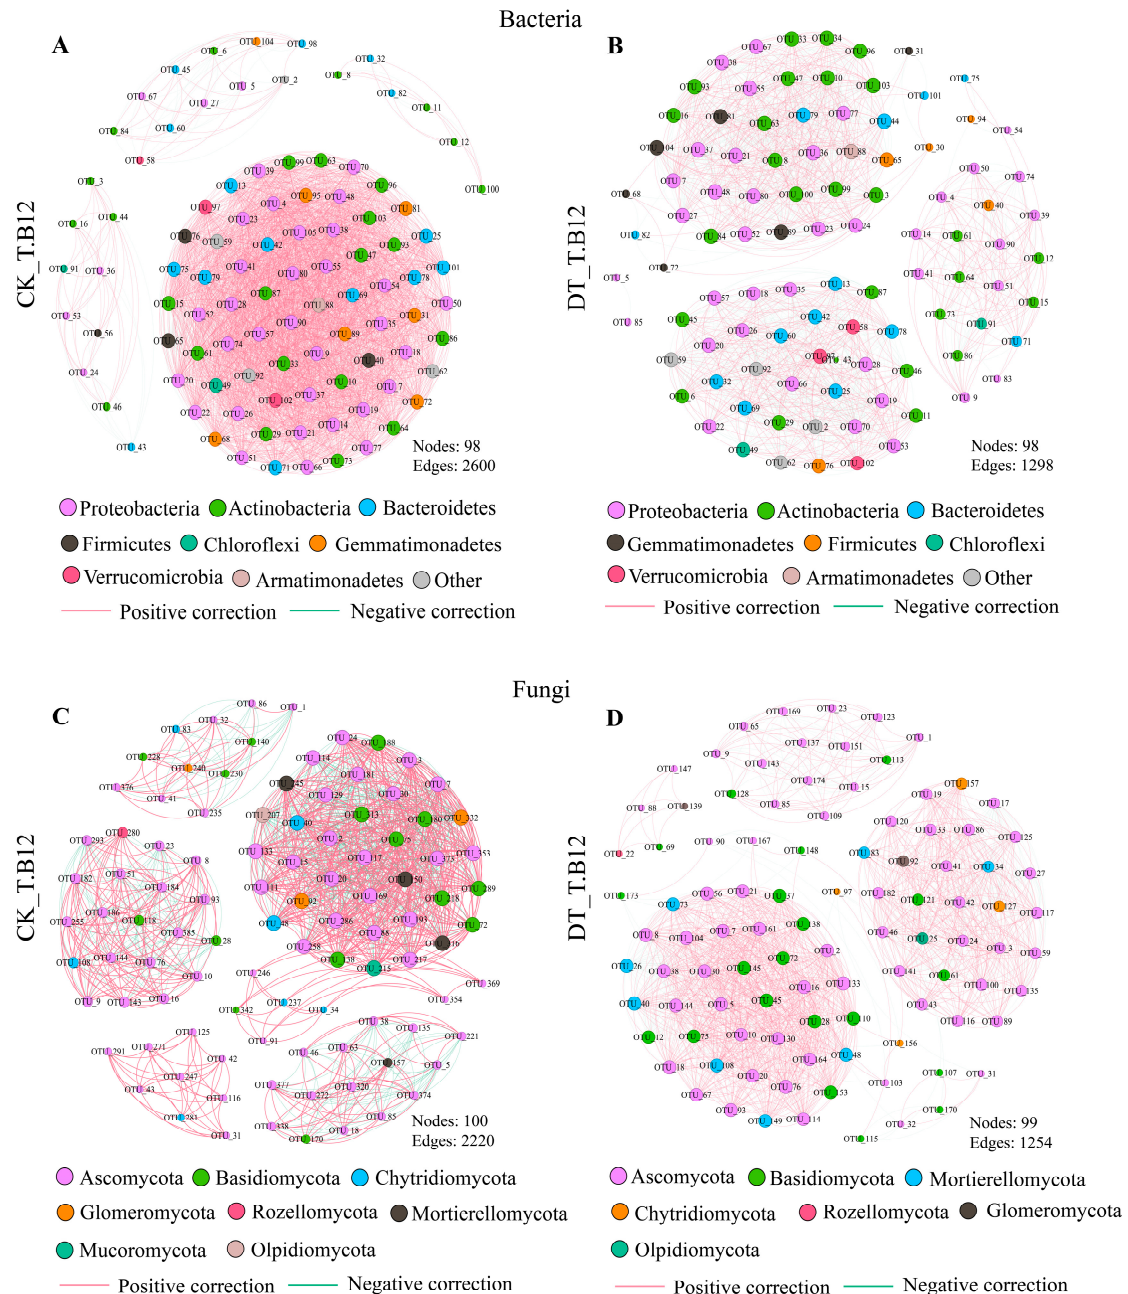

**Figure S9.** Rhizosphere microbial co-occurrence networks of T.B12 under drought stress.

Note: (A) CK \_ T.L36 rhizosphere bacteria co-occurrence network. (B) DT \_ T.L36 rhizosphere bacteria co-occurrence network. (C) CK \_ T.L36 rhizosphere fungi co-occurrence network. (D) DT \_ T.L36 rhizosphere fungi co-occurrence network. Connections indicate significant correlation (Screening conditions: Spearman's  $r > 0.9$ ,  $P < 0.01$ ); The pink line and the green line represent positive cor-relation and negative correlation, respectively. Each node represents an OTU, the size of the node represents the degree, and the node is colored by the phylum.
